# Supplementary material for: Elevated platelet–leukocyte complexes are associated with, but dispensable for myocardial ischemia–reperfusion injury
Source: PubMed Central journal article supplement (PMC9668925; doi:10.1007/s00395-022-00970-3), 2022-11-16
Supplement: 395_2022_970_MOESM1_ESM.pdf [file 395_2022_970_MOESM1_ESM.pdf]

## Supplement

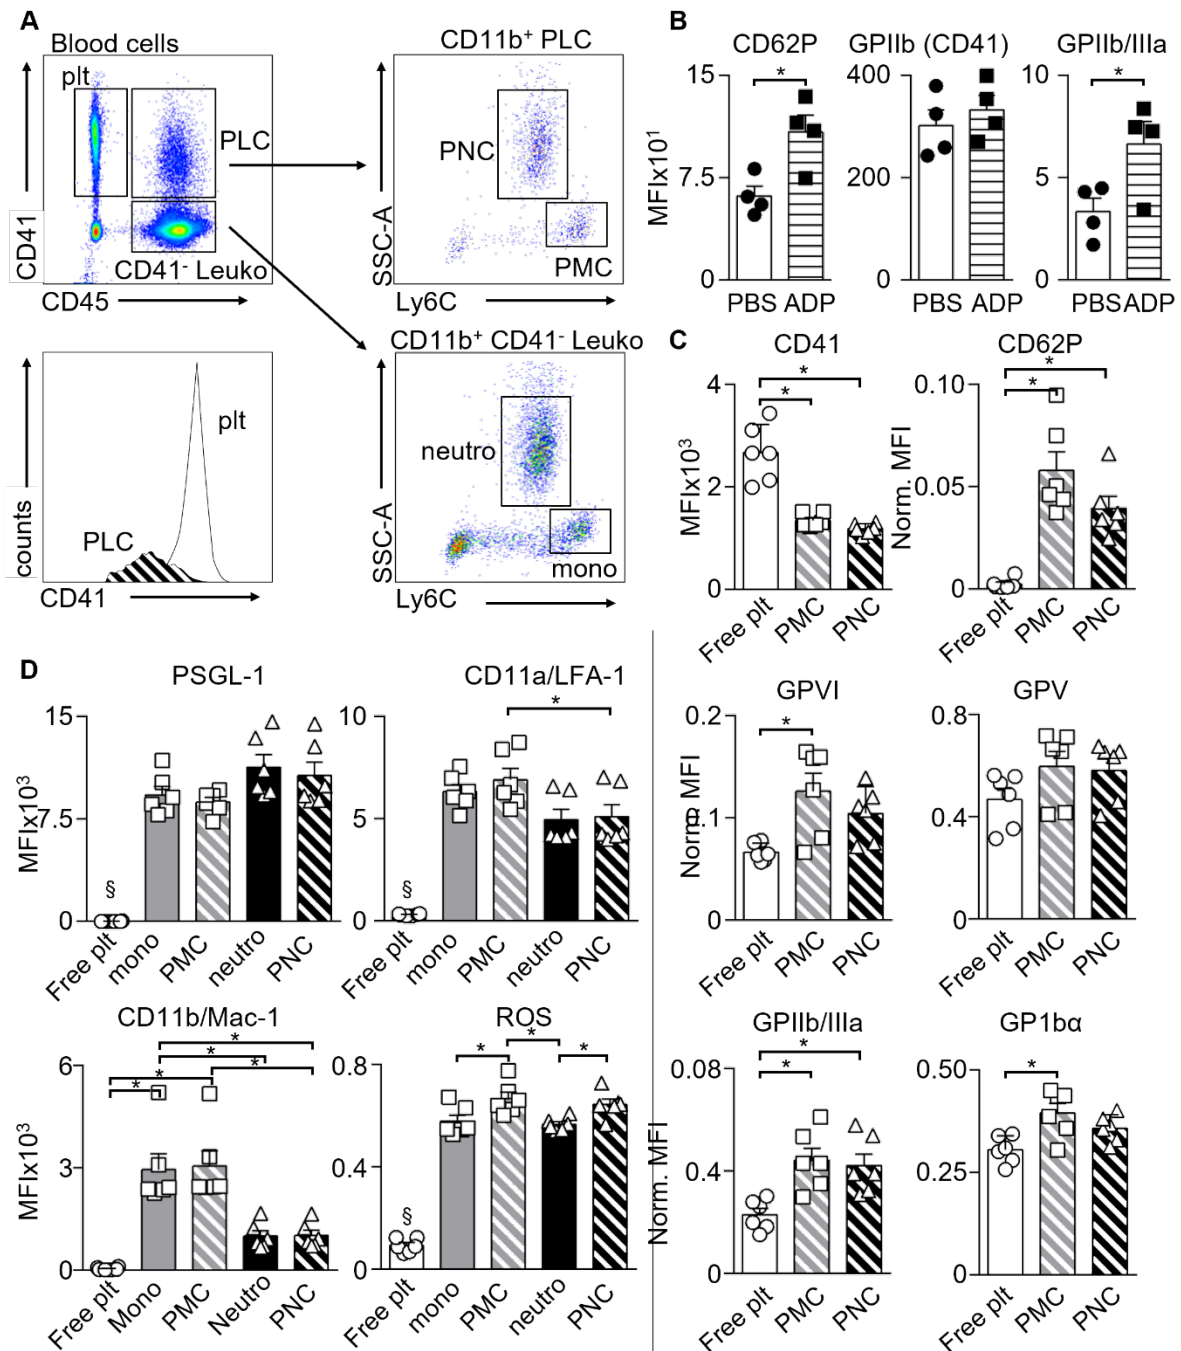

**Supplemental Figure 1: A**, Gating strategy to identify free and platelet-bound leukocytes (A, upper panel). Representative histogram depicting lower mean CD41 expression in platelets attached to leukocytes compared to those not attached (A, lower panel). **B**, Platelets stimulated with ADP (200nM) versus PBS for 30 min show higher P-selectin (CD62P) and activated GPIIb/IIIa receptor surface expressions whereas GPIIb (CD41) remains stable. Results are shown as mean±SEM; n=4 per group. \*p<0.05, t-test. **C**, Mean fluorescence intensity (MFI) of CD41, and MFIs of CD62P, GPIIb/IIIa, GPV, GPVI, GPIb surface expressions normalized to the respective CD41 MFI on platelets with or without complex formation with neutrophils (PNC) or monocytes (PMC). Results are shown as mean±SEM; n=6 per group. \*p<0.05 denotes statistically significant differences, one-way ANOVA, Holm-Sidak multiple

comparison test. **D**, MFI of PSGL-1, CD11a, CD11b surface expression levels on platelet-bound monocytes and neutrophils, and on unbound platelets, monocytes and neutrophils. MFI of DCFDA stained intracellular reactive oxygen species (ROS) activity in non-leukocyte bound platelets, monocytes, neutrophils, PMC and PNC. Results are shown as mean±SEM; n=6 per group. \*p<0.05 denotes statistically significant differences, §p<0.05 denotes statistically significant differences with all shown groups, one-way ANOVA, Holm-Sidak's multiple comparison test.

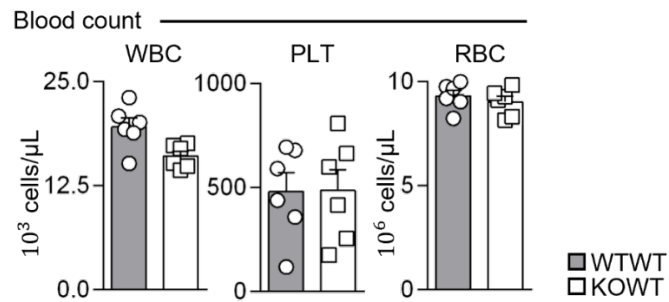

**Supplemental Figure 2:** Results of blood counts from WTWT and KOWT chimeras. There were no differences in cell counts. Results are presented as mean  $\pm$  SEM; n=6 per group. PLT, platelets. WBC, white blood cells/leukocytes. RBC, red blood cells/erythrocytes.

**Supplemental Table 1**

| <b>Epitope</b>        | <b>Conjugate</b>     | <b>Clone</b> | <b>Manufacturer</b> | <b>Location</b>    |
|-----------------------|----------------------|--------------|---------------------|--------------------|
| CD115(c-fms)          | APC                  | AFS98        | eBioscience         | San Diego, CA, USA |
| CD11a/CD18 (LFA-1)    | PerCP/Cy5.5          | H155-78      | BioLegend           | San Diego, CA, USA |
| CD11b                 | APC/Cy7              | M1/70        | BD Pharmingen       | San Jose, CA, USA  |
| CD16/CD32             | -                    | 93           | eBioscience         | San Diego, CA, USA |
| CD162                 | BV421                | 2PH1         | BD Bioscience       | San Jose, CA, USA  |
| CD19                  | PE                   | eBio1D3      | eBioscience         | San Diego, CA, USA |
| CD31                  | Pacific Blue         | 390          | BioLegend           | San Diego, CA, USA |
| CD41                  | PE/Cy7               | MWreg30      | BioLegend           | San Diego, CA, USA |
| CD42d                 | PerCP/Cy5.5          | 1C2          | BioLegend           | San Diego, CA, USA |
| CD45.2                | eFluor450            | 104          | eBioscience         | San Diego, CA, USA |
| CD45.2                | Brilliant Violet 510 | 104          | BioLegend           | San Diego, CA, USA |
| CD45R/B220            | PE                   | RA36B2       | BD Bioscience       | San Jose, CA, USA  |
| CD49b                 | APC                  | HMA2         | BioLegend           | San Diego, CA, USA |
| CD62P                 | PerCP-eFlour710      | Psel.K02.3   | eBioscience         | San Diego, CA, USA |
| CD62P                 | BV421                | RB40.34      | BD Horizon          | San Jose, CA, USA  |
| F4/80                 | PE/Cy7               | BM8          | BioLegend           | San Diego, CA, USA |
| GP1b $\alpha$ (CD42b) | DyLight649           | Xia.G5       | emfret Analytics    | Würzburg, Germany  |
| GP1Ib/IIIa            | PE                   | JON/A        | emfret Analytics    | Würzburg, Germany  |
| GPVI                  | FITC                 | JAQ1         | emfret Analytics    | Würzburg, Germany  |
| Gr-1                  | PE                   | RB6-8C5      | BioLegend           | San Diego, CA, USA |
| Ly6C                  | PerCP/Cy5.5          | HK1.4        | BioLegend           | San Diego, CA, USA |
| Ly6C                  | FITC                 | HK1.4        | BioLegend           | San Diego, CA, USA |
| Ly6G                  | PE                   | 1A8          | BD Pharmingen       | San Jose, CA, USA  |
| Ly6G                  | PE                   | 1A8          | BD Bioscience       | San Jose, CA, USA  |

**Supplemental Table 2**

| <b>Gene</b>    | <b>Assay ID</b> |
|----------------|-----------------|
| TNF $\alpha$   | Mm00443258      |
| CCL5           | Mm01302427m1    |
| IL-6           | Mm00446190m1    |
| CCL2           | Mm00441242m1    |
| IL-1b          | Mm00434226m1    |
| TGF $\beta$    | Mm01178820m1    |
| IL-10          | Mm00439614m1    |
| CXCL1          | Mm04207460m1    |
| MPO            | Mm01298424m1    |
| F3             | Mm00438855m1    |
| $\beta$ -actin | Mm4352341Em1    |
